# Supplementary material for: Quantitative proteomics reveals reduction of endocytic machinery components in gliomas
Source: PubMed Central journal article supplement — eBioMedicine. 2019 Jul 19;46:32–41. doi: 10.1016/j.ebiom.2019.07.039 (PMC6711119; doi:10.1016/j.ebiom.2019.07.039), 2019-07-19
Supplement: mmc1.pdf [file mmc1.pdf]

## Supplemental Materials

### Quantitative proteomics reveals reduction of endocytic machinery components in gliomas

Dominik P. Buser, Marie-Françoise Ritz, Suzette Moes, Cristobal Tostado, Stephan Frank, Martin Spiess, Luigi Mariani, Paul Jenö, Jean-Louis Boulay, and Gregor Hutter

#### Supplementary Figures

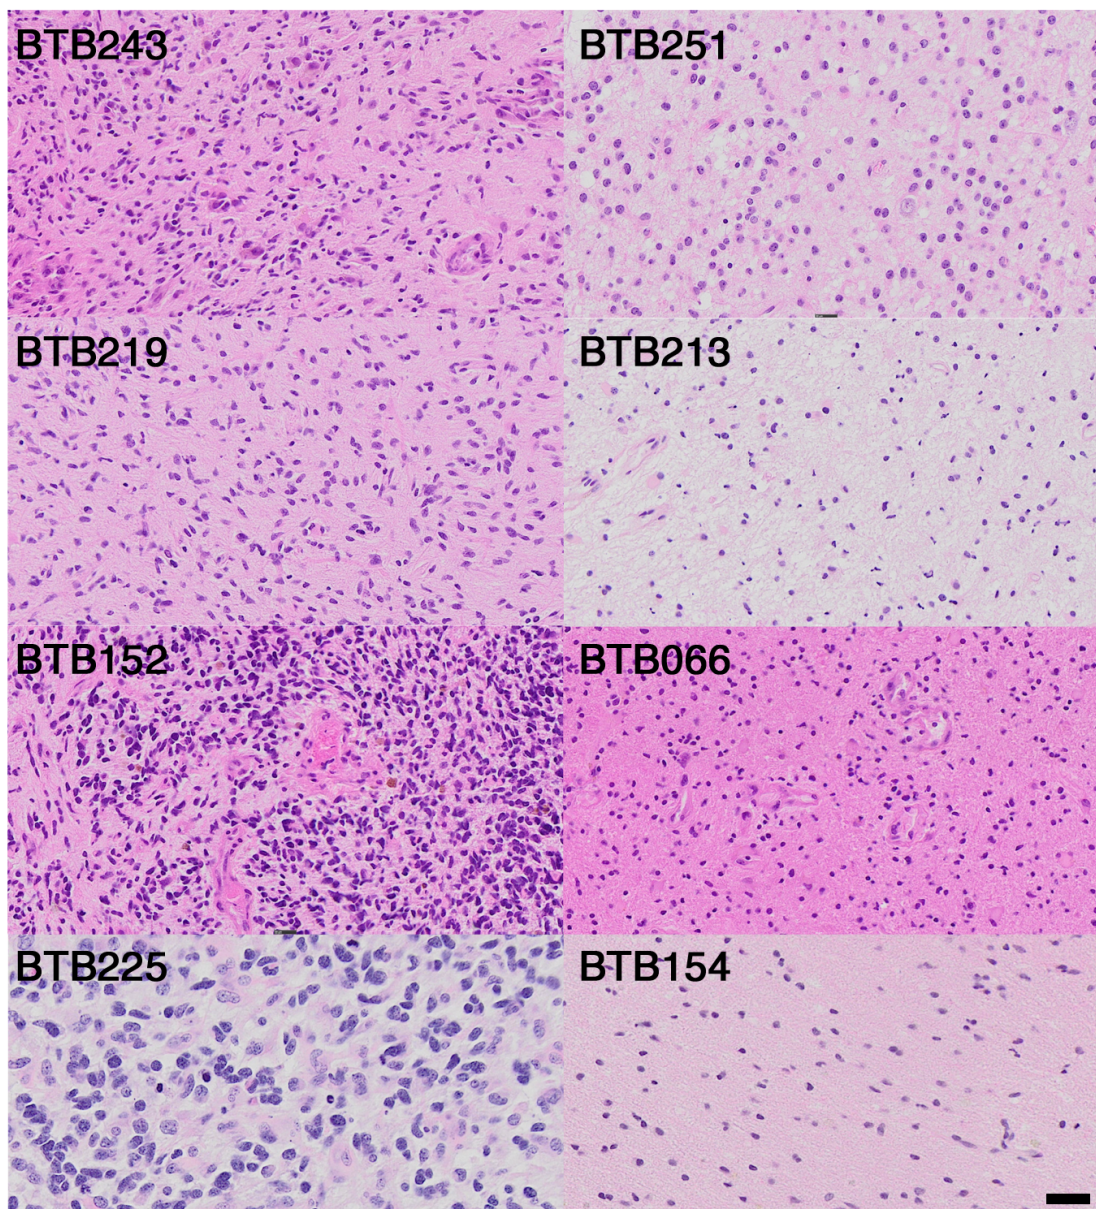

**Fig. S1.** Histomorphological features of glioma biopsies subjected to proteomic analysis. Hematoxylin- and eosin-stained, formalin-fixed, paraffin-embedded sections of proteomically analysed tumor biopsies. Bar: 20  $\mu\text{m}$ .

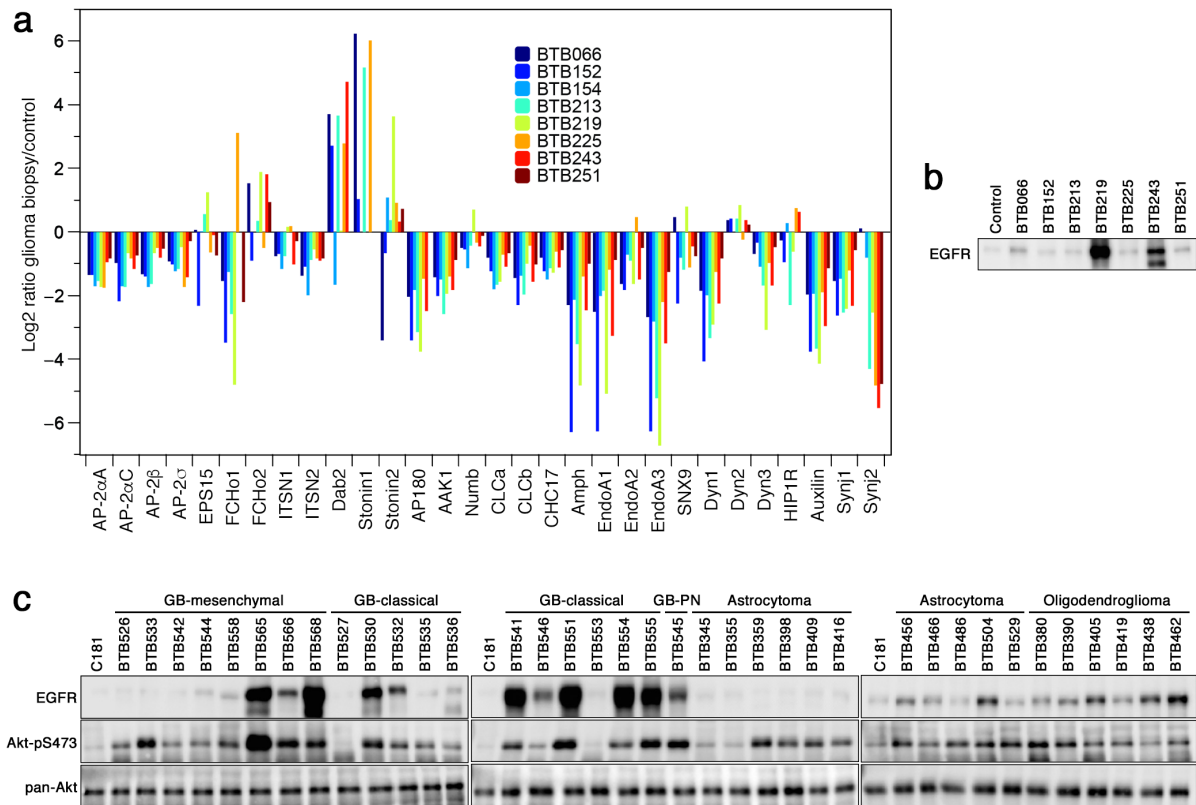

**Fig. S2.** Proteomic and immunoblot analysis of glioma biopsies. **(a)** Proteomic quantification of endocytic machinery components shown for each individual biopsy. Log<sub>2</sub> ratio of the individual endocytic components compared between glioma biopsies and control (see also Fig. 2d). Full names of proteins can be found in Table S4. **(b)** Immunoblot analysis of EGFR protein levels of biopsies subjected to proteomic analysis. Of note, BTB219 and BTB243 carry *EGFR* amplification (see also Table S1). **(c)** Immunoblot analysis of EGFR protein levels of biopsies derived from different glioma subclasses, including GB (classical), GB (mesenchymal), GB (proneural (PN)), astrocytoma and oligodendrogloma (see also Fig. 3c). Disregarding any genetic background, biopsies in general demonstrated an increased steady-state activation of the PI3K/AKT downstream pathway, as judged by pAKT-S473 levels relative to pan-Akt.

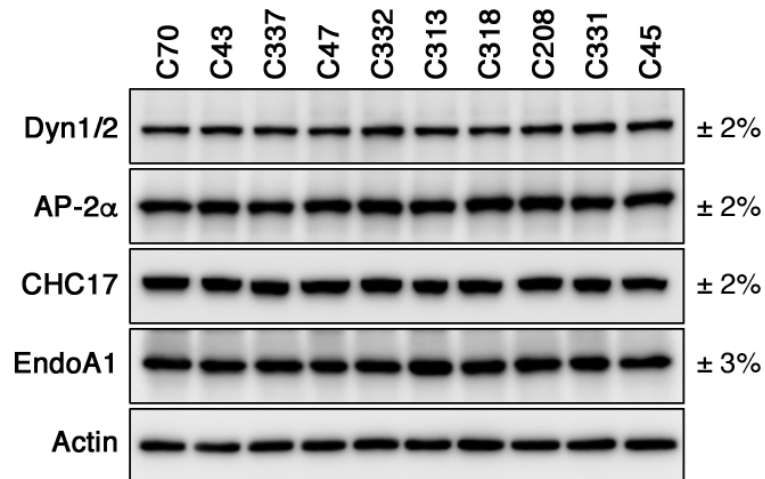

**Fig. S3.** Immunoblot analysis of additional control white matter samples (C). While endocytic machinery components (Dyn1/2, AP-2α, CHC17, EndoA1) among glioma subclasses were robustly and largely depleted, additional control white matter specimens showed a constant expression level throughout. White matter biopsy controls were free of brain tumor/metastasis. Percentage displays statistical variation in control specimen expression.

## Supplementary Tables

**Table S1.** Grading and summary of the mutational status of the biopsies used in this study. Legend: WT, wild-type.

| Biopsy | Grade | <i>EGFR</i>      | <i>PDGFRA</i>    | <i>IDH1/2</i>     | <i>TERT</i>       | <i>CKDN2A</i> |
|--------|-------|------------------|------------------|-------------------|-------------------|---------------|
| BTB219 | III   | amplification    | amplification    | <i>IDH1/2</i> WT  | <i>TERT</i> G250A | deletion      |
| BTB243 | IV    | amplification    | no amplification | <i>IDH1/2</i> WT  | <i>TERT</i> G228A | deletion      |
| BTB225 | IV    | no amplification | amplification    | <i>IDH1/2</i> WT  | <i>TERT</i> G228A | deletion      |
| BTB066 | IV    | no amplification | amplification    | <i>IDH1/2</i> WT  | <i>TERT</i> G228A | no deletion   |
| BTB251 | II    | no amplification | amplification    | <i>IDH2</i> R172K | <i>TERT</i> G228A | no deletion   |
| BTB154 | II    | no amplification | amplification    | <i>IDH1</i> R132S | <i>TERT</i> G250A | no deletion   |
| BTB152 | IV    | no amplification | amplification    | <i>IDH1</i> R132H | <i>TERT</i> WT    | no deletion   |
| BTB213 | II    | no amplification | amplification    | <i>IDH1</i> R132H | <i>TERT</i> WT    | no deletion   |

**Table S2.** Clinical/surgical characteristics, histopathological diagnosis and survival of the patients for biopsy sample analysis by proteomics. Legend: AA, anaplastic astrocytoma; GBM, glioblastoma; OA, oligoastrocytoma; ODG, oligodendroglioma; FU, follow-up; GTR, gross total resection; PR, partial resection; F, female; M, male; FU, follow-up.

| Biopsy | Grade | Age | Sex | Histological diagnosis | Overall survival (days) | Degree of resection    |
|--------|-------|-----|-----|------------------------|-------------------------|------------------------|
| BTB219 | III   | 48  | F   | AA                     | 405                     | GTR (awake craniotomy) |
| BTB243 | IV    | 60  | M   | GBM                    | 325                     | GTR                    |
| BTB225 | IV    | 68  | M   | GBM                    | 205                     | GTR                    |
| BTB066 | IV    | 71  | M   | GBM                    | 138                     | PR                     |
| BTB251 | II    | 35  | F   | ODG                    | Alive, FU 6y            | GTR                    |
| BTB154 | II    | 50  | F   | ODG                    | Alive, FU 5y            | GTR                    |
| BTB152 | IV    | 27  | F   | GBM                    | Alive, FU 6y            | GTR                    |
| BTB213 | II    | 38  | M   | A                      | Alive, FU 4y            | GTR (awake craniotomy) |

**Table S3.** REVIGO proteomic cluster analysis of down- and upregulated proteins.

| Cluster name                  | Annotated Terms                                                                                                                                                                                                                                                        | Sample association          |
|-------------------------------|------------------------------------------------------------------------------------------------------------------------------------------------------------------------------------------------------------------------------------------------------------------------|-----------------------------|
| <b>Upregulated proteins</b>   |                                                                                                                                                                                                                                                                        |                             |
| Cluster I                     | TAP binding, HLA class-I histocompatibility                                                                                                                                                                                                                            | BTB 066, 213, 219, 243, 251 |
|                               | $\beta$ 2-microglobulin binding                                                                                                                                                                                                                                        | BTB219                      |
|                               | Death receptor binding (RIPK1, TLR signaling)                                                                                                                                                                                                                          | BTB219                      |
|                               | PDGFR-binding                                                                                                                                                                                                                                                          | BTB152/154                  |
| Cluster II                    | “protease terms” <ul style="list-style-type: none"> <li>• cysteine-type endopeptidase activity</li> <li>• serine-type carboxypeptidase activity</li> <li>• caspase 1-9 (except caspase 5)</li> <li>• sentrin-specific protease 2, 3, 6, 7</li> <li>• otulin</li> </ul> | All samples                 |
| Cluster III                   | “RNA/DNA binding”                                                                                                                                                                                                                                                      | All samples                 |
| Cluster IV                    | “Upregulation of epigenetic events” <ul style="list-style-type: none"> <li>• histone acetyltransferase</li> <li>• histone lysine N-methyltransferase</li> <li>• histone kinase</li> </ul>                                                                              | All samples                 |
| <b>Downregulated proteins</b> |                                                                                                                                                                                                                                                                        |                             |
| Cluster V                     | “transporter and channel activities” <ul style="list-style-type: none"> <li>• glucose</li> <li>• hydrogen</li> <li>• phosphate</li> <li>• inorganic ion</li> </ul>                                                                                                     | All samples                 |
| Cluster VI                    | “binding of ...” <ul style="list-style-type: none"> <li>• bone morphogenetic protein</li> <li>• neuroligin</li> <li>• myosin</li> <li>• microtubule</li> <li>• transcription factor</li> <li>• clathrin</li> </ul>                                                     | All samples                 |
| Cluster VII                   | “binding of small molecules” <ul style="list-style-type: none"> <li>• phosphatidyl serine</li> <li>• phospholipids (calcium-dependent)</li> <li>• calcium ions</li> <li>• glycine</li> </ul>                                                                           | All samples                 |

**Table S4.** Overview of endocytic machinery components. Protein accession number is from UniProtKB.

| Gene name | Protein name      | Accession number | Description                                                      |
|-----------|-------------------|------------------|------------------------------------------------------------------|
| AAK1      | AAK1              | Q2M2I8           | AP-2-associated protein kinase 1                                 |
| AMPH      | Amph              | P49418           | Amphiphysin                                                      |
| AP2A1     | AP-2 $\alpha$ (A) | O95782           | AP-2 complex subunit $\alpha$ (A)                                |
| AP2A2     | AP-2 $\alpha$ (C) | O94973           | AP-2 complex subunit $\alpha$ (C)                                |
| AP2B1     | AP-2 $\beta$      | P63010           | AP-2 complex subunit $\beta$                                     |
| AP2S1     | AP-2 $\sigma$     | P53680           | AP-2 complex subunit $\sigma$                                    |
| CLTA      | CLCa              | P09496           | Clathrin light chain a                                           |
| CLTB      | CLCb              | P09497           | Clathrin light chain b                                           |
| CLTC      | CHC17             | Q00610           | Clathrin heavy chain 17                                          |
| DAB2      | Dab2              | P98082           | Disabled homolog 2                                               |
| DNAJC6    | Auxilin           | O75061           | Uncoating phosphatase auxilin                                    |
| DNM1      | Dyn 1             | Q05193           | Dynamamin 1                                                      |
| DNM2      | Dyn 2             | P50570           | Dynamamin 2                                                      |
| DNM3      | Dyn 3             | Q9UQ16           | Dynamamin 3                                                      |
| EPS15     | EPS15             | P42566           | EGFR substrate 15                                                |
| FCHO1     | FCHo1             | O14526           | F-BAR domain-containing Fer/Cip4 homology domain-only proteins 1 |
| FCHO2     | FCHo2             | Q0JRZ9           | F-BAR domain-containing Fer/Cip4 homology domain-only proteins 2 |
| HIP1R     | HIP1R             | O75146           | Huntingtin-interacting protein 1-related protein                 |
| ITSN1     | ITSN1             | Q15811           | Intersectin 1                                                    |
| ITSN2     | ITSN2             | Q9NZM3           | Intersectin 2                                                    |
| NUMB      | Numb              | P49757           | Protein numb homolog                                             |
| SH3GL1    | EndoA2            | Q99961           | Endophilin A2                                                    |
| SH3GL2    | EndoA1            | Q99962           | Endophilin A1                                                    |
| SH3GL3    | EndoA3            | Q99963           | Endophilin A3                                                    |
| SNAP91    | AP180             | O60641           | Clathrin coat assembly protein AP180                             |
| SNX9      | SNX9              | Q9Y5X1           | Sorting nexin 9                                                  |
| STON1     | Stonin 1          | Q9Y6Q2           | Stonin 1                                                         |
| STON2     | Stonin 2          | Q8WXE9           | Stonin 2                                                         |
| SYNJ1     | Synj 1            | O43426           | Synaptojanin 1                                                   |
| SYNJ2     | Synj 2            | O15056           | Synaptojanin 2                                                   |

**Table S5.** Clinical/surgical characteristics, histopathological diagnosis and survival of the patients for additional biopsy sample analysis Western blot/validation. Legend: AA, anaplastic astrocytoma; GBM, glioblastoma; s GBM, secondary glioblastoma; s GBM o, secondary glioblastoma with oligodendroglia component; OA, oligoastrocytoma; OG, oligodendrogloma; FU, follow-up; GTR, gross total resection; PR, partial resection; n.a., not applicable. The overall survival information was not available at time of publication.

| <b>BTB</b> | <b>Grade</b> | <b>Age</b>       | <b>Sex</b> | <b>Histological diagnosis</b> | <b>Degree of resection</b> |
|------------|--------------|------------------|------------|-------------------------------|----------------------------|
| BTB181     | n.a.         | Epilepsy control | M          | n.a.                          | n.a.                       |
| BTB345     | III          | 42               | M          | AA                            | GTR                        |
| BTB355     | III          | 25               | M          | OG                            | GTR                        |
| BTB359     | IV           | 29               | F          | s GBM                         | GTR                        |
| BTB380     | IV           | 61               | M          | s GBM o                       | GTR                        |
| BTB390     | III          | 44               | M          | AA                            | GTR                        |
| BTB398     | III          | 37               | M          | OA                            | GTR                        |
| BTB405     | IV           | 47               | F          | s GBM o                       | GTR                        |
| BTB409     | III          | 20               | M          | OA                            | GTR                        |
| BTB416     | III          | 49               | F          | OA                            | GTR                        |
| BTB419     | II           | 58               | F          | OG                            | GTR                        |
| BTB438     | II           | 34               | M          | OG                            | GTR                        |
| BTB456     | II           | 51               | F          | OA                            | GTR                        |
| BTB462     | II           | 51               | M          | OG                            | GTR                        |
| BTB466     | IV           | 73               | M          | s GBM                         | GTR                        |
| BTB486     | IV           | 63               | M          | s GBM                         | GTR                        |
| BTB504     | IV           | 36               | M          | s GBM                         | GTR                        |
| BTB526     | IV           | 59               | M          | GBM                           | GTR                        |
| BTB527     | IV           | 60               | F          | GBM                           | GTR                        |
| BTB529     | III          | 45               | F          | AA                            | GTR                        |
| BTB530     | IV           | 76               | F          | GBM                           | GTR                        |
| BTB532     | IV           | 59               | M          | GBM                           | GTR                        |
| BTB533     | IV           | 81               | M          | GBM                           | GTR                        |
| BTB535     | IV           | 71               | F          | GBM                           | GTR                        |
| BTB536     | IV           | 68               | M          | GBM                           | Re-resection               |
| BTB541     | IV           | 68               | F          | GBM                           | GTR                        |
| BTB542     | IV           | 77               | M          | GBM                           | Subtotal resection         |
| BTB544     | IV           | 57               | M          | GBM                           | GTR                        |
| BTB545     | IV           | 65               | M          | GBM                           | GTR                        |
| BTB546     | IV           | 56               | M          | GBM                           | GTR                        |
| BTB551     | IV           | 51               | M          | GBM                           | GTR                        |
| BTB553     | IV           | 57               | F          | GBM                           | GTR                        |
| BTB554     | IV           | 76               | F          | GBM                           | GTR                        |
| BTB555     | IV           | 64               | M          | GBM                           | GTR                        |
| BTB558     | IV           | 28               | M          | GBM                           | GTR                        |
| BTB565     | IV           | 50               | M          | GBM                           | GTR                        |
| BTB566     | IV           | 52               | F          | GBM                           | GTR                        |
| BTB568     | IV           | 59               | M          | GBM                           | GTR                        |

**Table S6.** Grading and summary of the mutational and molecular status of the additional biopsies used in this study. See also Capper et al., 2018 for more detailed information regarding the subclass.<sup>1</sup> Legend: WT, wild-type; Subclass according to methylation profiler: MES, mesenchymal; ND, not determined; RET, retention; MET, methylated; UNM, unmethylated; LOH, loss of heterozygosity; n; number of amplification; n.a, not applicable.

| BTB    | Grade | Subclass (methylation profiler) | TERT  | IDH   | 1p19q   | MGMT | EGFR |
|--------|-------|---------------------------------|-------|-------|---------|------|------|
| BTB181 | n.a.  | n.a.                            | n.a.  | n.a.  | n.a.    | n.a. | n.a. |
| BTB345 | III   | n.a.                            | WT    | R132H | RET     | n.a. | WT   |
| BTB355 | III   | n.a.                            | WT    | R132H | ND      | n.a. | n.a. |
| BTB359 | IV    | n.a.                            | WT    | R132G | RET     | n.a. | n.a. |
| BTB380 | IV    | n.a.                            | G228A | R132H | LOH     | n.a. | n.a. |
| BTB390 | III   | n.a.                            | G228A | R132H | LOH     | n.a. | n.a. |
| BTB398 | III   | n.a.                            | WT    | R132H | RET     | n.a. | n.a. |
| BTB405 | IV    | n.a.                            | G228A | R132H | LOH     | n.a. | n.a. |
| BTB409 | III   | n.a.                            | WT    | R132L | LOH     | n.a. | n.a. |
| BTB416 | III   | n.a.                            | WT    | R132H | LOH     | n.a. | n.a. |
| BTB419 | II    | n.a.                            | G228A | R132H | LOH     | n.a. | n.a. |
| BTB438 | II    | n.a.                            | G228A | R132H | LOH     | n.a. | n.a. |
| BTB456 | II    | n.a.                            | WT    | R132C | RET     | n.a. | n.a. |
| BTB462 | II    | n.a.                            | G228A | R132H | LOH     | n.a. | n.a. |
| BTB466 | IV    | n.a.                            | WT    | R132H | RET     | n.a. | n.a. |
| BTB486 | IV    | n.a.                            | WT    | R132H | RET     | n.a. | n.a. |
| BTB504 | IV    | n.a.                            | n.a.  | R132H | LOH 19q | MET  | n.a. |
| BTB526 | IV    | MES                             | G250A | WT    | no      | UNM  | 2n   |
| BTB527 | IV    | RTK II CL                       | G250A | WT    | no      | MET  | >2n  |
| BTB529 | III   | A                               | WT    | R132H | no      | MET  | 2n   |
| BTB530 | IV    | RTK II CL                       | G250A | WT    | no      | MET  | >2n  |
| BTB532 | IV    | RTK II CL                       | G228A | WT    | no      | ND   | >2n  |
| BTB533 | IV    | MES                             | ND    | WT    | ND      | UNM  | >2n  |
| BTB535 | IV    | RTK II CL                       | ND    | WT    | no      | UNM  | 2n   |
| BTB536 | IV    | RTK II CL                       | WT    | WT    | no      | UNM  | >2n  |
| BTB541 | IV    | RTK II CL                       | G250A | WT    | no      | MET  | >2n  |
| BTB542 | IV    | MES                             | G228A | WT    | no      | MET  | 2n   |
| BTB544 | IV    | MES                             | G250A | WT    | no      | MET  | 2n   |
| BTB545 | IV    | RTK I PN                        | G250A | WT    | no      | MET  | >2n  |
| BTB546 | IV    | RTK II CL                       | G250A | WT    | no      | MET  | >2n  |
| BTB551 | IV    | RTK II CL                       | ND    | WT    | no      | UNM  | >2n  |
| BTB553 | IV    | RTK II CL                       | G228A | WT    | no      | UNM  | >2n  |
| BTB554 | IV    | RTK II CL                       | n.a.  | WT    | no      | MET  | >2n  |
| BTB555 | IV    | RTK II CL                       | n.a.  | WT    | no      | UNM  | >2n  |
| BTB558 | IV    | MES                             | n.a.  | WT    | no      | MET  | 2n   |
| BTB565 | IV    | MES                             | n.a.  | WT    | no      | MET  | >2n  |
| BTB566 | IV    | MES                             | n.a.  | WT    | no      | MET  | 2n   |
| BTB568 | IV    | MES                             | n.a.  | WT    | no      | UNM  | >2n  |

## References

1. Capper D, Jones DTW, Sill M, Hovestadt V, Schrimpf D, Sturm D, et al. DNA methylation-based classification of central nervous system tumours. Nature. 2018;555(7697):469-74.
